# Supplementary material for: USP10-mediated ZEB1 deubiquitination regulates MEK-ERK-induced colorectal cancer metastasis
Source: Research Square preprint supplement (doi:10.21203/rs.3.rs-1735411/v1), 2022-06-15
Supplement: Supplementary file 1 [file d6f681c3287482d7564c23bf.docx]

Table S1. Deubiquitinases identified from the Biogrid database that may potentially interact with ZEB1.

| VCPIP |
| --- |
| UCHL3 |
| USP7 |
| USP10 |
| USP13 |
| USP26 |
| USP29 |
| USP42 |
| USP43 |
| USP51 |
| USP52 |
| USP53 |
| USP54 |
